# Supplementary material for: Achieving Effective Multimodal Imaging with Rare-Earth Ion-Doped CaF2 Nanoparticles
Source: Pharmaceutics. 2022 Apr 11;14(4):840. doi: 10.3390/pharmaceutics14040840 (PMC9024546; doi:10.3390/pharmaceutics14040840)
Supplement: Supplementary file 1 [file pharmaceutics-14-00840-s001.zip › pharmaceutics-1649142-supplementary.pdf]

## Supporting Information:

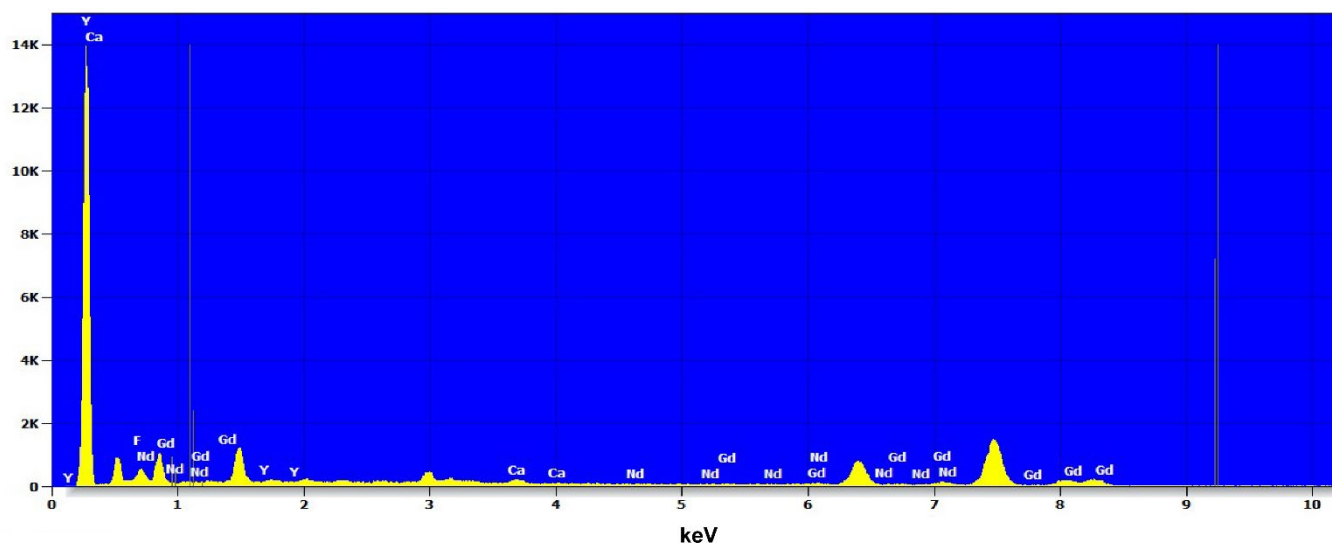

**Figure S1.** EDS spectrum of  $\text{CaF}_2\text{:Y,Gd,Nd}$  NPs.

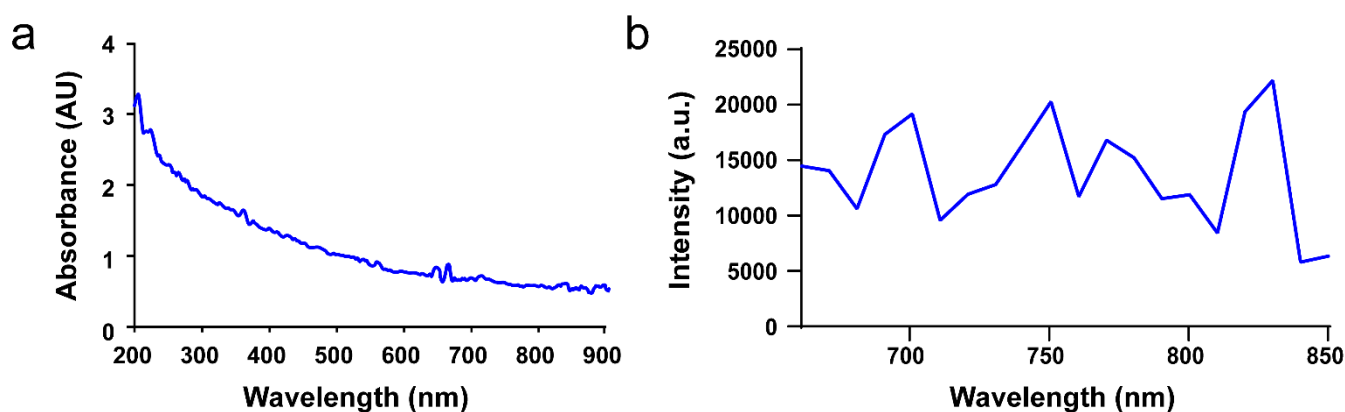

**Figure S2.** Absorption and emission spectra of  $\text{CaF}_2\text{:Y,Gd,Nd}$  NPs in the visible region. (a) The absorption spectra of  $\text{CaF}_2\text{:Y,Gd,Nd}$  solution (10 mg/mL) in the visible region measured with SpectraMax® iD3 Multi-Mode Microplate Reader; (b) the emission spectra of  $\text{CaF}_2\text{:Y,Gd,Nd}$  NPs solution (10 mg/mL) in the 680–850 nm region measured with SpectraMax® iD3 Multi-Mode Microplate Reader under 620 nm excitation.
